# Supplementary material for: Molecular Characteristics of the Fatty-Acid-Binding Protein (FABP) Family in Spirometra mansoni―A Neglected Medical Tapeworm
Source: MDPI journal article supplement (doi:10.3390/ani13182855), 2023-09-08
Supplement: s1 [file s1]

*Supplementary materials*

## **Molecular Characteristics of the Fatty-Acid-Binding Protein (FABP) Family in *Spirometra mansoni*—A Neglected Medical Tapeworm**

**Table S1.** Primer sets used in qRT-PCR analysis.

**Table S2.** Summary of fatty acid binding proteins in cestodes and trematodes.

**Figure S1.** 3D analysis of SmFABP. (a) Tertiary structure prediction of SmFABP; (b) Quality assessment of tertiary structural models.

**Figure S2.** Conserved motifs of FABP sequence motifs in cestodes and trematodes.

**Table S1.** Primers used in qRT-PCR analysis.

| Gene ID  | Primer name | Sequence (5'-3')                  | Product size (bp) |
|----------|-------------|-----------------------------------|-------------------|
| ON933963 | ON933963-F  | CTGACAATCACGAAGGAGGG AGTG-        | 132               |
|          | ON933963-R  | GACTTTACTTTGCGACC                 |                   |
| ON933964 | ON933964-F  | GCCTGTTGGCGATGGTTA AC-            | 153               |
|          | ON933964-R  | CTGTTTCAGCGTCTTGC                 |                   |
| ON933965 | ON933965-F  | GATGACTATTACATTGGAGGGC            | 148               |
|          | ON933965-R  | AACCTTGACGTAGTGTCGAACA            |                   |
| ON933966 | ON933966-F  | AGCGTTTGGGTTTAAATCTG              | 167               |
|          | ON933966-R  | ATCCATCGTGGTCAAGTCG               |                   |
| ON933967 | ON933967-F  | ATTATGGATGCCTTCCTTGG              | 120               |
|          | ON933967-R  | CGTCGGTTTCATTGCGTTA               |                   |
| ON933968 | ON933968-F  | AGAGCGCCTTGGCTTCAG                | 179               |
|          | ON933968-R  | CGTGTCTTCCATCCATCGT               |                   |
| ON933969 | ON933969-F  | CACCCACAGTGACCATCG                | 177               |
|          | ON933969-R  | CGTCGCTTTCAACGCATCT               |                   |
| OP146602 | OP146602-F  | GGGCGATGGCTACAGTCT TCGCGTTCAAC-   | 183               |
|          | OP146602-R  | GTAGGTTAC                         |                   |
| OP146603 | OP146603-F  | ACTGCCGCAAACACCCTG CGCCTTCAAC-    | 192               |
|          | OP146603-R  | GCATCTCC                          |                   |
| OP146604 | OP146604-F  | CTTTGTTGAGTACCTGCGTTGT CTTTGTGAG- | 94                |
|          | OP146604-R  | TACCTGCGTTGT                      |                   |
| OP146605 | OP146605-F  | CTGACAATCACGAAGGAGGG AGTG-        | 132               |
|          | OP146605-R  | GACTTTACTTTGCGACC                 |                   |
| GAPDH    | GAPDH-F     | AGCAACCTCGTTGATGTCGT TGAATTGAC-   | 97                |
|          | GAPDH-R     | CGTGGGTGGAG                       |                   |

**Table S2.** Summary of fatty acid binding proteins in cestodes and trematodes.

| Class   | Family            | Genus                    | Species           | SS | Sequence ID (Gene)                                                                                                                            |
|---------|-------------------|--------------------------|-------------------|----|-----------------------------------------------------------------------------------------------------------------------------------------------|
| Cestoda | Diphyllbothriidea | <i>Dibothriocephalus</i> | <i>D. latus</i>   | 4  | DILT_0000132601, DILT_0001268101, DILT_0001058501, DILT_0001980201                                                                            |
|         |                   | <i>Spirometra</i>        | <i>S. mansoni</i> | 11 | Sm_AGC52709, Sm_ON933963, Sm_ON933965, Sm_ON933966, Sm_ON933967, Sm_ON933968, Sm_ON933969, Sm_VZI04125, Sm_VZI04122, Sm_VZI32859, Sm_VZI36676 |
|         |                   |                          |                   |    |                                                                                                                                               |
|         |                   |                          |                   |    |                                                                                                                                               |

|                 |                        |                          |   |                                                                                                                                                                             |
|-----------------|------------------------|--------------------------|---|-----------------------------------------------------------------------------------------------------------------------------------------------------------------------------|
| Taeniidae       | <i>Schistocephalus</i> | <i>S. solidus</i>        | 3 | SSLN_0001728001, SSLN_0001464001, SSLN_0000692001                                                                                                                           |
|                 |                        | <i>E. canadensis</i>     | 1 | EcG7_10693                                                                                                                                                                  |
|                 | <i>Echinococcus</i>    | <i>E. granulosus</i>     | 5 | EgrG_000549800, EgrG_000551000, EgrG_000550000, EgrG_AAK00579, EgrG_A404573570,                                                                                             |
|                 |                        | <i>E. multilocularis</i> | 4 | EmuJ_000550000, EmuJ_000549800, EmuJ_000551000, EmuJ_QIR83324                                                                                                               |
|                 | <i>Taenia</i>          | <i>T. asiatica</i>       | 9 | TASK_0000022601, TASK_0000016301, TASK_0000016401, TASK_0000248201, TASK_0000036601, TASK_TASs00016g03152, TASK_TASs00016g03144, TASK_TASs01149g11934, TASK_TASs00016g03162 |
|                 |                        | <i>T. saginata</i>       | 7 | TSA_s00009g02238, TSA_s00063g07179, TSA_s00009g02246, TSA_s00009g02247, TSAs_00009g02255, TSA_s00009g02250, TSA_s00052g06517                                                |
|                 |                        | <i>T. solium</i>         | 4 | TsM_001185100, TsM_000802800, TsM_000713700, TsM_000425500                                                                                                                  |
|                 |                        | <i>T. multiceps</i>      | 6 | Tm4G_010159, Tm4G_010154, Tm4G_010158, Tm4G_010150, Tm4G_010405, Tm4G_ADQ55926                                                                                              |
|                 | <i>Hydatigera</i>      | <i>H. taeniaeformis</i>  | 3 | TTAC_0000273201, TTAC_0001160201, TTAC_0001022901                                                                                                                           |
| Hymenolepididae | <i>Hymenolepis</i>     | <i>H. diminuta</i>       | 9 | HDID_0000423301, HDID_0000500301, HDID_VUZ50563, HDID_VUZ50561, HDID_VUZ52025, HDID_VUZ52023, HDID_VUZ52011, HDID_VUZ52008, HDID_VUZ51980                                   |
|                 |                        | <i>H. microstoma</i>     | 7 | HmN_000362200, HmN_000764500, HmN_000764600, HmN_000534900, HmN_000764100, HmN_003038490, HmN_CDS33731                                                                      |
|                 |                        | <i>H. nana</i>           | 7 | HNAJ_0001229001, HNAJ_0001201101, HNAJ_0000307201, HNAJ_0001349301, HNAJ_0000684501, HNAJ_VDN98381, HNAJ_VDO15736                                                           |
|                 |                        |                          |   |                                                                                                                                                                             |

|           |                  |                          |                        |   |                                                                                               |
|-----------|------------------|--------------------------|------------------------|---|-----------------------------------------------------------------------------------------------|
| Trematoda | Mesocestoididae  | <i>Mesocestoides</i>     | <i>M. corti</i>        | 7 | MCU_012220, MCU_014206, MCU_009118, MCU_012061, MCU_012222, MCU_013971, MCU_009121,           |
|           | Opisthorchiidae  | <i>Atriophallophorus</i> | <i>A. winterbourni</i> | 3 | jcf_7180000277480, jcf_7180000272514, jcf_7180000223989                                       |
|           |                  | <i>Clonorchis</i>        | <i>C. sinensis</i>     | 4 | CSKR_110663, CSKR_105127, CSKR_111106, CSKR_203997                                            |
|           |                  | <i>Opisthorchis</i>      | <i>O. felineus</i>     | 4 | CRM22_000718, CRM22_004371, CRM22_009816.1, CRM22_009816.2                                    |
|           | Fasciolodae      | <i>Fasciolopsis</i>      | <i>F. buski</i>        | 3 | FBUS_06290, FBUS_KAA0196039, FBUS_KAA0196038                                                  |
|           |                  | <i>Fasciola</i>          | <i>F. gigantica</i>    | 6 | FGIG_06927, FGIG_10130, FGIG_10131, FGIG_05100, FGIG_07656, FGIG_ADK74337                     |
|           |                  |                          | <i>F. hepatica</i>     | 7 | Fhe_157, Fhe_2403_0.19, Fhe_331_0.57, Fhe_2403_0.11, Fhe_331_0.56, Fhe_THD25754, Fhe_AJO53791 |
|           | Paragonimidae    | <i>Paragonimus</i>       | <i>P. westermani</i>   | 4 | DEA37_0003571, DEA37_0004447, DEA37_KAF8569548, DEA37_KAF8568862                              |
|           | Schistosomatidae | <i>Schistosoma</i>       | <i>S. bovis</i>        | 2 | DC041_0001593, DC041_0009718                                                                  |
|           |                  |                          | <i>S. curassoni</i>    | 1 | SCUD_0001125801                                                                               |
|           |                  |                          | <i>S. haematobium</i>  | 2 | MS3_0017002, MS3_0014435                                                                      |
|           |                  |                          | <i>S. japonicum</i>    | 2 | Sjp_0004450, Sjp_TRE_0001710601                                                               |
|           |                  |                          | <i>S. mansoni</i>      | 5 | Smp_046800.1, Smp_046800.2, Smp_P29498, Smp_AAM18480, Smp_pdb 2POA                            |
|           |                  |                          | <i>S. margrebowiei</i> | 2 | SMRZ_0001436901, SMRZ_0000001601                                                              |
|           |                  |                          | <i>S. matthei</i>      | 1 | SMTD_0001257601                                                                               |
|           |                  |                          | <i>S. rodhaini</i>     | 2 | SROB_0000190201, SROB_0000738701                                                              |

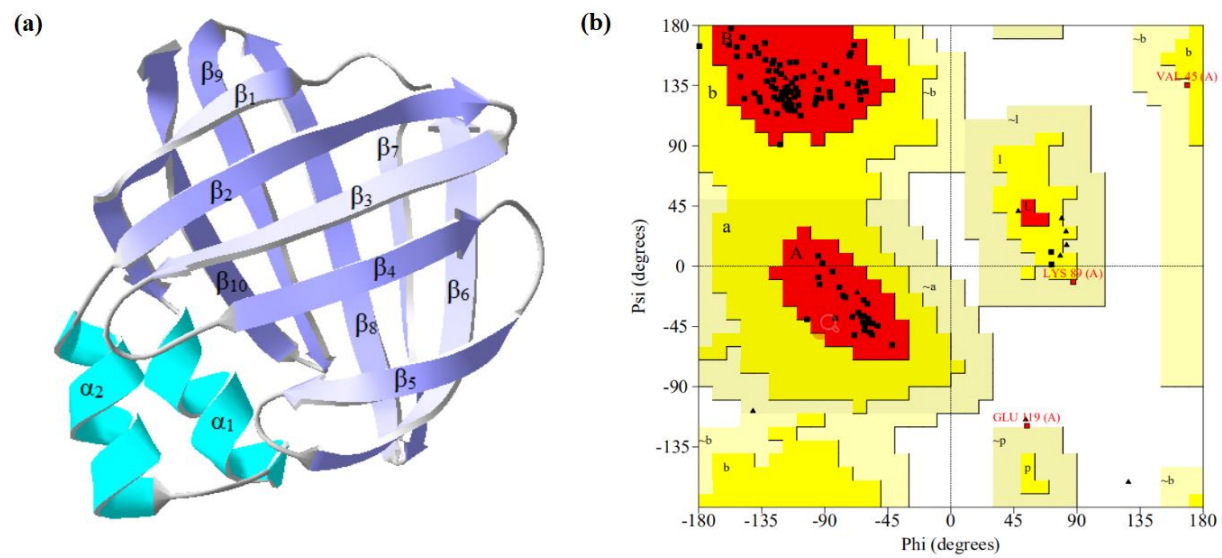

**Figure S1.** 3D analysis of SmFABP. (a) Tertiary structure prediction of SmFABP; (b) Quality assessment of tertiary structural models.

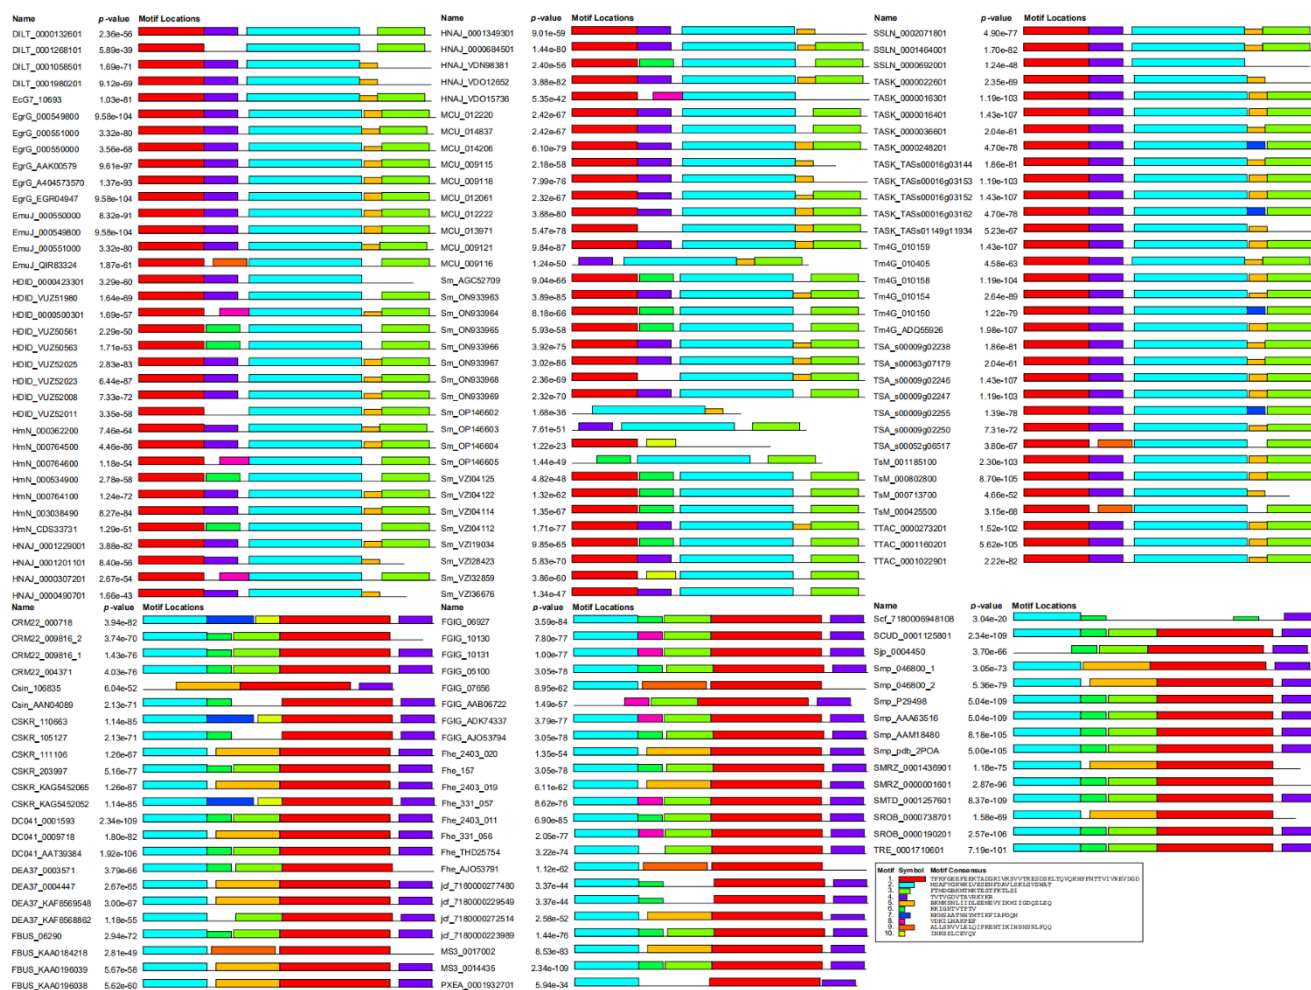

**Figure S2.** Conserved motifs of FABP sequence motifs in cestodes and trematodes.
